# Supplementary material
Source: Springer Nature journal article supplement (https://www.springermedizin.de/resource/supplementary/12985_2009_758_MOESM3_ESM.pdf/9608640)

**$10^5$  PFU/ml**

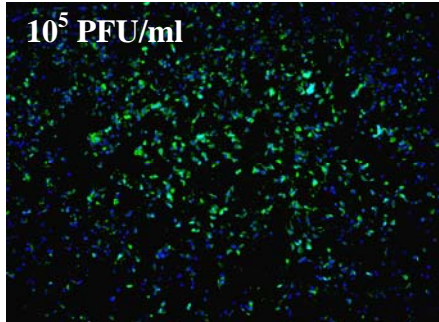

**$10^4$  PFU/ml**

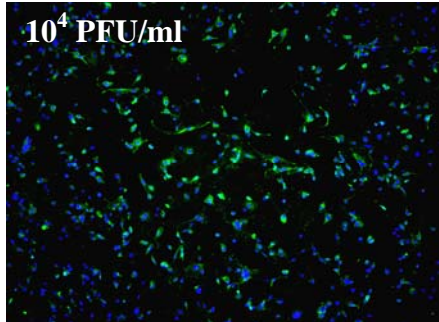

**$10^3$  PFU/ml**

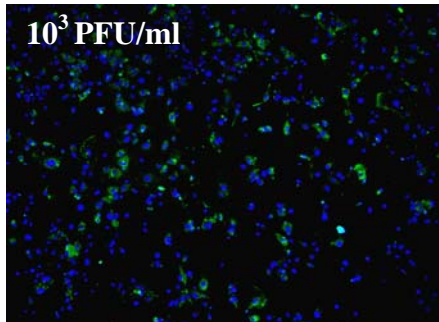

**$10^2$  PFU/ml**

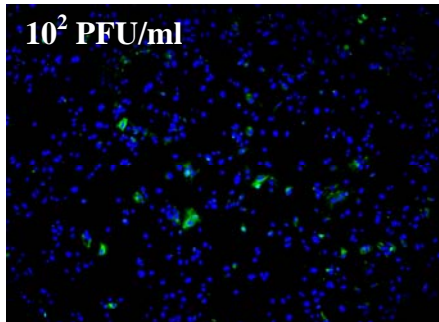

**$10^1$  PFU/ml**

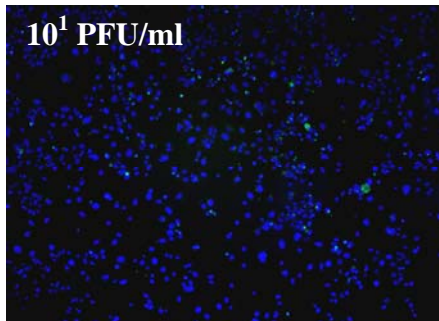

**$10^0$  PFU/ml**

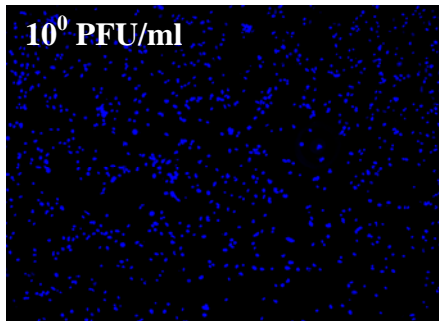

**Mock-infected**

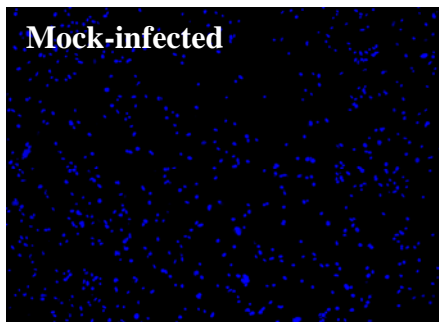

**Isotype control**

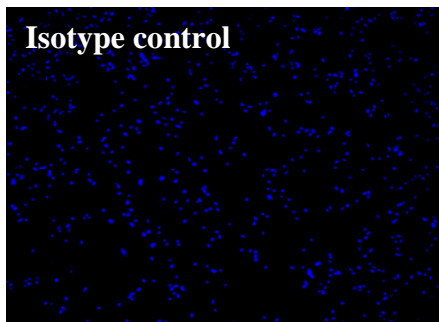

Supplement: MOESM3 [file 9608640]
